# Supplementary material
Source: MDPI journal article supplement (https://www.mdpi.com/1999-4907/12/10/1314)
Supplement: s1 [file s1 › forests-1376604-supplementary.pdf]

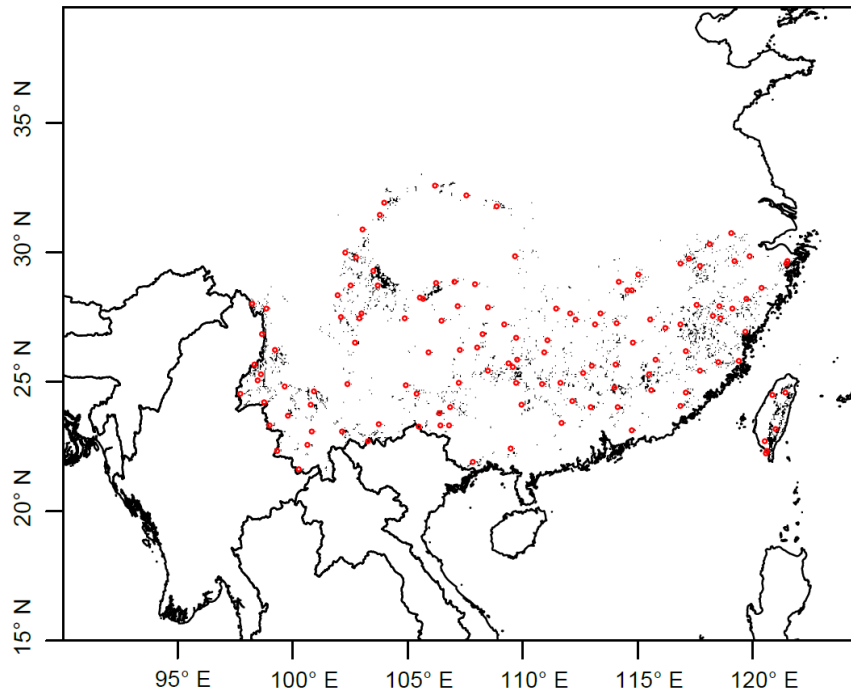

**Figure S1.** The distribution of the presence points (in red) extracted from digitized EBLF distribution (in black) used for predicting the modern distribution of EBLF.

**Table S1.** Estimates of relative contributions of the environmental variables to the Maxent model.

| Code  | Variable                                                 | Percent contribution |
|-------|----------------------------------------------------------|----------------------|
| BIO6  | Min Temperature of Coldest Month                         | 27.1                 |
| BIO16 | Precipitation of Wettest Quarter                         | 22.6                 |
| BIO17 | Precipitation of Driest Quarter                          | 20.5                 |
| BIO4  | Temperature Seasonality (standard deviation*100)         | 13.6                 |
| BIO12 | Annual Precipitation                                     | 8.7                  |
| BIO5  | Max Temperature of Warmest Month                         | 4.3                  |
| BIO2  | Mean Diurnal Range (Mean of monthly (max temp-min temp)) | 3.3                  |
